1 **First-in-Human Trial of a Recombinant Stabilized Prefusion SARS-CoV-2 Spike Protein**  
2 **Vaccine with Adjuvant of Aluminum Hydroxide and CpG 1018**

3

4 Szu-Min Hsieh, M.D.<sup>1</sup>, Wang-Da Liu, M.D.<sup>1</sup>, Yu-Shan Huang, M.D.<sup>1</sup>, Yi-Jiun Lin, Ph.D.<sup>2</sup>,  
5 Erh-Fang Hsieh, Ph.D.<sup>2</sup>, Wei-Cheng Lian, Ph. D.<sup>2</sup>, Charles Chen, Ad. Prof.<sup>2,3</sup>, I-Chen Tai,  
6 M.D.<sup>2\*</sup>, Shan-Chwen Chang, M.D., Ph.D.<sup>1\*</sup>

7 <sup>1.</sup> Section of Infectious Diseases, Division of Infectious Diseases, Department of Internal Medicine,  
8 National Taiwan University Hospital and College of Medicine, National Taiwan University, Taiwan

9 <sup>2.</sup> Medigen Vaccine Biologics Corp., Taiwan

10 <sup>3.</sup> College of Science and Technology, Temple University, Philadelphia, PA 19122, U.S.A.

11 \*Corresponding authors

12 I-Chen Tai, Corresponding Author

13 Email: kathytai@medigenvac.com

14 Postal address: Medigen Vaccine Biologics Corp.

15 7F, No. 16, Ln. 120, Sec. 1, Neihu Rd., Taipei 114, Taiwan

16 TEL: +886-2-77450830 #604

17

18 Shan-Chwen Chang, Corresponding Author

19 Email: changsc@ntu.edu.tw

20 Postal address: National Taiwan University Hospital

21 No.7, Zhongshan S. Rd., Zhongzheng Dist., Taipei City 100, Taiwan

22 TEL: +886-2-23123456#887999

23 **Keywords: COVID-19 vaccine; CpG 1018; S-2P protein;**

24

25

26 **Abstract**

27 ***Design***

28 This is a phase 1, dose-escalation open-label trial to evaluate the safety and  
29 immunogenicity of MVC-COV1901, a recombinant stabilized prefusion SARS-CoV-2 spike  
30 (S-2P) protein vaccine with adjuvant of aluminum hydroxide and CpG 1018.

31 ***Methods***

32 We enrolled 45 healthy adults from 20 to 49 years of age to be administered with two  
33 vaccinations of MVC-COV1901 in a low dose (LD), middle dose (MD), and high dose (HD)  
34 of spike protein at 28 days apart. There were 15 participants in each dose group, and all of  
35 them were followed up for 28 days after the second vaccination at the time of interim analysis.  
36 Adverse events (AEs) and laboratory data were recorded for safety evaluation. Blood samples  
37 were collected for wild-type SARS-CoV-2 and pseudovirus neutralization assays as well as  
38 SARS-CoV-2 spike-specific immunoglobulin G (IgG) at various times. Overall, the study  
39 duration will be 7 months.

40 ***Results***

41 Solicited events were mostly mild and similar in the participants of all three dose groups.  
42 No subject experienced fever. There were no serious nor adverse events of special interest at  
43 the time point of this interim report. After the second vaccination, the SARS-CoV-2 spike  
44 specific IgG titers increased with peak geometric mean titers at 7178.245 (LD), 7746.086

45 (MD), and 11220.58 (HD), respectively. Serum neutralizing activity was detected by two  
46 methods in all participants of MD and HD groups, with geometric mean values generally  
47 comparable to those of a panel of control convalescent serum specimens. All of the  
48 participants in the MD and HD groups were seroconverted after the second vaccination.

49 ***Conclusions***

50 The MVC-COV1901 vaccine is safe and elicits remarkable immune responses especially  
51 in the MD and HD groups.

52 Trial Registration: [ClinicalTrials.gov NCT 04487210](https://clinicaltrials.gov/ct2/show/study/NCT04487210)

53

54

## 55 **Introduction**

56 Human infections due to SARS-CoV-2 began to spread globally following the outbreak  
57 in Wuhan, China. WHO panel declared the COVID-19 outbreak as a public health emergency  
58 of international concerns, and this outbreak was also subsequently characterized as a  
59 pandemic declared by the WHO on March 11<sup>th</sup>, 2020.<sup>1</sup>

60 Approximately 15% of COVID-19 cases are severe that requires oxygen support, and  
61 5% are critical disease with complications such as respiratory failure, acute respiratory  
62 distress syndrome (ARDS), sepsis, septic shock, etc.<sup>2</sup> A meta-analysis assessed the risk of  
63 underlying diseases in severe patients compared to those in non-severe conditions and  
64 showed the pooled odds ratios were 2.36 for hypertension, 2.46 for respiratory system disease,  
65 and 3.42 for cardiovascular disease and 2.07 for diabetes.<sup>3</sup>

66 There is currently no cure medication for the potentially lethal COVID-19. Development  
67 of a range of vaccines will provide flexibility with prevention strategies. For vaccines  
68 intended to generate protective immune response, using an antigen with proper conformation  
69 is critical. The neutralizing antibodies induced by spike (S) protein block viruses from  
70 binding to their target receptor ACE2 and hence inhibit viral infection. S protein has two  
71 major conformational states, prefusion and postfusion.<sup>4</sup> S-2P protein is a recombinant version  
72 of the S protein developed by the laboratory of Dr. Barney S. Graham (Vaccine Research  
73 Center, National Institute of Allergy and Infectious Diseases[NIAID], U.S.A.), and is a

74 stabilized prefusion S ectodomain, encoding residues 1–1208 of SARS-CoV-2 spike protein  
75 with two proline substitutions at residues 986 and 987, a “GSAS” substitution at residues  
76 682–685 to abolish the furin cleavage site, and a T4 fibritin trimerization motif at the  
77 C-terminus.<sup>5</sup> The cryo–electron microscopy structure showed the protein produced by this  
78 construct is in the prefusion conformation and can bind to ACE2.<sup>5(p1261)</sup> Similar strategy had  
79 been used to retain MERS-COV S protein in the prefusion conformation and demonstrated  
80 that stabilized MERS-COV S protein was able to elicit high neutralizing antibody.<sup>6</sup>  
81 Medigen’s MVC-COV1901 vaccine is formulated as S-2P adjuvanted with Dynavax’s CpG  
82 1018 and aluminum hydroxide. CpG 1018 is an oligodeoxynucleotide which acts as a  
83 toll-like receptor 9 agonist and has been shown in our preclinical studies to enhance  
84 immunogenicity and induce a Th1-skewed immune response<sup>7</sup>.

## 85 **Methods**

### 86 ***Trial Design***

87 This study was a phase 1, prospective, open-label, dose-escalation study to evaluate the  
88 safety and immunogenicity of a SARS-CoV-2 vaccine in adults aged 20 to 49 years. The  
89 study was commenced at the National Taiwan University Hospital in northern Taiwan from  
90 September 2020. The trial protocol and informed consent form were approved by the Taiwan  
91 Food and Drug Administration and the ethics committee at the site. The trial was conducted  
92 in accordance with the principles of the Declaration of Helsinki and Good Clinical Practice.

93 An independent data and safety monitoring board (DSMB) was established to monitor safety  
94 data. (ClinicalTrials.gov NCT 04487210)

### 95 *The Investigational Vaccine*

96 We applied technology previously used for MERS-CoV to produce a  
97 prefusion-stabilized SARS-CoV-2 spike protein, S-2P, designed by Dr. Barney S. Graham  
98 (Vaccine Research Center, NIAID, U.S.A.). The MVC-COV1901 contained S-2P protein  
99 adjuvanted with CpG 1018 and aluminum hydroxide as previous reported.<sup>7(p7)</sup>. The vaccine  
100 administered at a volume of 0.5 mL as a single dose via intramuscular injection. The  
101 production of the vaccine was conducted in Medigen Vaccine Biologics Corp. facility which  
102 is compliant with the current good manufacturing practices (cGMP).

### 103 *Participants*

104 Eligible participants were healthy adults from 20 to 49 years of age. Eligibility was  
105 determined based on medical history, physical examination, laboratory tests, and  
106 investigators' clinical judgment. Exclusion criteria included a history of known potential  
107 exposure to SARS CoV-1 or 2 viruses, having received any other COVID-19 vaccine,  
108 impaired immune function, history of autoimmune disease, abnormal autoantibody tests,  
109 febrile or acute illness within 2 days of first dose, and acute respiratory illness within 14 days  
110 of first dose.

111 ***Interventions***

112 This study was a dose escalation study with three separate sub-phases for participants  
113 from 20 to 49 years of age. Each sub-phase consisted of 15 participants. The three different  
114 dose levels employed in this clinical trial are LD, MD, and HD of S-2P protein adjuvanted  
115 with CpG 1018 and aluminum hydroxide for phase 1a, 1b, and 1c, respectively. The  
116 vaccination schedule consisted of two doses, administered by intramuscular (IM) injection of  
117 0.5 mL in the deltoid region of non-dominant arm 28 days apart, on Day 1 and Day 29. The  
118 protocol permitted an interim analysis to make decisions regarding vaccine strategy.

119 Phase 1a

120 Four sentinel participants would be recruited to receive LD of S-2P protein with  
121 adjuvant to evaluate preliminary safety data of the vaccine. If no  $\geq$  Grade 3 AE or SAE  
122 occurred within 7 days after the first vaccination in the 4 sentinel participants, dosing of the  
123 remaining participants in Phase 1a and Phase 1b would proceed.

124 Phase 1b

125 Another 4 sentinel participants would be enrolled to receive MD of S-2P protein with  
126 adjuvant in Phase 1b. If no  $\geq$  Grade 3 AE or SAE occurred within 7 days after the first  
127 vaccination in the 4 sentinel participants, dosing of the remaining participants in Phase 1b  
128 and Phase 1c would proceed.

129 Phase 1c

130 Another 4 sentinel participants would be enrolled to receive HD of S-2P protein with  
131 adjuvant in phase 1c. If no  $\geq$  Grade 3 AE or SAE occurred within 7 days after the first  
132 vaccination in the 4 sentinel participants, dosing of the remaining participants in Phase 1c  
133 would proceed.

134 An interim analysis of immunogenicity data and safety data from baseline to 28 days  
135 after the second vaccination for all participants were carried out when all of the participants  
136 have completed the visit (at 28 days after the second vaccination).

137 *Safety Assessment*

138 The primary endpoint was to evaluate the safety of MVC-COV1901 in three different  
139 strengths (LD, MD, and HD of S-2P protein adjuvanted with CpG 1018 and aluminum  
140 hydroxide) from Day 1 to 28 days after the second vaccination. Vital signs and  
141 electrocardiogram (ECG) were performed before and after vaccination. Participants were  
142 observed for at least 30 min after each vaccination to identify any immediate adverse events  
143 (AEs), and were asked to record solicited local and systemic AEs in the participant's diary  
144 card for up to 7 days after each vaccination. Unsolicited AEs were recorded for 28 days  
145 following each vaccination; all other AEs, serious adverse events (SAEs) and adverse events  
146 of special interests (AESIs) were recorded throughout the study period.

147 Serum samples were collected for safety evaluations. Hematology, biochemistry and



148 immunology tests were measured as well.

#### 149 ***Immunogenicity Analysis***

150 The immunogenicity endpoints were to evaluate the immunogenicity in terms of  
151 neutralizing antibody titers and binding antibody titers at 14 days (Day 15) and 28 days (Day  
152 29) after first and at 14 days (Day 43) and 28 days (Day 57) after second vaccination, as well  
153 as 90 days and 180 days after the second vaccination.

#### 154 *SARS-CoV-2 spike-specific immunoglobulin G (IgG)*

155 Total serum anti-Spike IgG titers were detected with direct enzyme-linked  
156 immunosorbent assay (ELISA) using customized 96-well plates coated with S-2P antigen.

#### 157 *SARS-CoV-2 pseudovirus neutralization assay*

158 Pseudovirus production and titration followed the previous report.<sup>7(p7)</sup> Serial dilutions of  
159 the samples to be tested were performed (initial dilution of 1:20; diluted two-fold to a final  
160 dilution of 1:2560). The diluted serum was mixed with equal volume of pseudovirus (1000  
161 TU) and incubated before adding to the plates with HEK293-hAce2 cells ( $1 \times 10^4$  cells/well).  
162 The amount of pseudovirus entering the cells was calculated by lysing and measuring the  
163 relative luciferase units (RLU). Fifty percent inhibition dilution (concentration) titers (ID<sub>50</sub>)  
164 were calculated considering uninfected cells as 100% neutralization and cells transduced with  
165 virus as 0% neutralization and reciprocal ID<sub>50</sub> geometric mean titers (GMT) were both  
166 determined.

167 Wild-type SARS-CoV-2 neutralization assay

168 SARS-CoV-2 virus (hCoV-19/Taiwan/CGMH-CGU-01/2020, GenBank accession  
169 MT192759) was obtained and titrated to obtain TCID<sub>50</sub>, and Vero E6 cells (2.5 × 10<sup>4</sup>  
170 cells/well) were seeded in 96-well plates and incubated. The sera underwent a total of 11  
171 two-fold dilutions with the final dilution being 1:8192, and the diluted sera were mixed with  
172 equal volume of viral solution containing 100 TCID<sub>50</sub>. The serum-virus mixture was  
173 incubated and then added to the cell plates containing the Vero E6 cells, followed by further  
174 incubation. The neutralizing titer was defined as the reciprocal of the highest dilution capable  
175 of inhibiting 50% of the CPE (NT<sub>50</sub>), which was calculated in accordance with the formula of  
176 the Reed-Muench method.

177 **Statistical Analysis**

178 Safety analysis was performed on the total vaccinated group (TVG) population who  
179 received at least 1 dose of vaccine. The endpoints related to immunogenicity consisted of the  
180 following: antigen specific immunoglobulins, neutralizing antibody titers of wild type virus  
181 and pseudovirus, in terms of geometric mean titer (GMT) and seroconversion rate (SCR).  
182 SCR is defined as the percentage of participants with ≥ 4-fold increase in titers from the  
183 baseline or from half of the lower limit of detection (LoD) if undetectable at baseline.

184

185

186 **Results**

187 **Study Population**

188 In total, 77 participants were screened. Of these, 45 eligible participants had completed  
189 two doses of MVC-COV1901. Participants' baseline demographic characteristics are  
190 summarized in Table 1.

191 **Vaccine Safety**

192 Neither SAEs nor AESI occurred at this time point of interim analysis. No participants  
193 missed the second dose. All of the local and systemic AEs were mild, except for one  
194 malaise/fatigue in the HD group. None of the participants had fever after either dose 1 or  
195 dose 2. Solicited adverse events after the first and the second vaccination were similar.  
196 Evaluation of safety laboratory values, ECG interpretation, and unsolicited adverse events  
197 revealed no specific concern.

198 **Immunogenicity**

199 The humoral immunogenicity results are summarized in Figure 1.

200 *SARS-CoV-2 spike specific immunoglobulin G (IgG)*

201 Binding IgG titers to S protein increased rapidly after the second vaccination, with  
202 seroconversion in all participants by Day 43 and 57. The GMTs peaked at Day 43 with value  
203 of 7178.245 (95% CI: 4240.336 ~12151.68), 7746.086 (95% CI: 5530.230 ~10849.79),  
204 11220.58 (95% CI: 8592.293 ~14652.84) in LD, MD, HD groups, respectively. The

205 responses in LD, MD, and HD groups were also similar to the values of convalescent serum  
206 specimens.(2179.598, [95%CI: 1240.897~3828.396]). (Fig 1A)

207 *Neutralization responses for SARS-CoV-2 pseudovirus*

208 Before vaccination, no subject had detectable pseudovirus neutralizing titers ( $ID_{50}$ ) at the  
209 lower limit of serum concentration tested (1:20 dilution) in the assay. At Day 43, the  
210 pseudovirus neutralizing titers ( $ID_{50}$ ) showed peaked GMTs of 538.496 (95% CI: 261.9403  
211 ~1107.036), 993.075 (95% CI: 654.9991 ~1505.648), and 1905.840 (95% CI: 1601.667  
212 ~2267.779) in LD, MD, and HD groups, respectively. All of the participants in three doses  
213 were seroconverted after the second vaccination (Fig 1B).

214 *Neutralization responses for wild type SARS-CoV-2 virus*

215 Before vaccination, no subject had detectable wild-type virus neutralizing titers ( $NT_{50}$ )  
216 at the lower limit of serum concentration tested (1:8 dilution) in the assay. However, after the  
217 second vaccination, neutralizing responses were identified in serum samples from all  
218 participants in MD and HD groups. At Day 43, the GMTs were 33.317 (95% CI: 18.5239  
219 ~59.9256), 76.307 (95% CI: 53.7497 ~108.3309), and 167.402 (95% CI: 122.0492  
220 ~229.6090) in LD, MD, and HD groups, respectively. The MD and HD groups were similar  
221 in terms of GMT (52.205 [95% CI: 37.9448 ~71.8246] and 81.909 [95% CI: 55.8131  
222 ~120.2070]), respectively, at Day 57). These responses were also similar to the value of  
223 convalescent serum specimens. (42.674, [95%CI: 26.37666~69.0403]) All participants in MD

224 and HD groups were seroconverted at Day 43 and Day 57. The results of wild-type

225 SARS-CoV-2 neutralizing antibody titer are summarized in Fig 1C.

## 226 **Discussion**

227 This is the first clinical trial report to address the protein-based vaccine using the S-2P  
228 protein developed by NIAID, U.S.A. as the antigen, and adjuvanted with CpG 1018 and  
229 aluminum hydroxide.

230 This interim analysis demonstrated that the MVC-COV1901 vaccine was well tolerated  
231 and immunogenic in healthy adults aged 20 to 49 years. Across the three dose groups, local  
232 injection-site reactions were all mild. This safety profile is similar to that described in the  
233 previous report for subunit protein vaccines adjuvanted with CpG 1018 or aluminum  
234 hydroxide.<sup>8,9</sup> With regards to the occurrence rate and severity of solicited AEs, no differences  
235 were noticed among the LD, MD, and HD groups, or between the first and second  
236 vaccination.

237 The rates of detectable neutralizing response in all three dose groups at baseline were  
238 0%, aligning with the fact that there was no circulating SARS-CoV-2 in Taiwan. The  
239 neutralizing antibody titers were measurable at Day 43 and Day 57 for all dose levels. All  
240 participants in MD and HD groups were seroconverted in terms of wild-type SARS-CoV-2  
241 neutralizing response. Besides, the wild type neutralizing antibody response profile also  
242 demonstrated a good correlation with IgG and pseudovirus neutralizing antibody titers.

243 Although the correlation of protection is not available at present, serum neutralizing activity  
244 has been shown to be correlate of protection for other viruses while developing vaccines,  
245 such as yellow fever vaccine, polio vaccine, and Japanese encephalitis vaccine,<sup>10</sup> and is  
246 generally accepted as a useful biomarker of the in vivo humoral response. Besides, the  
247 preclinical study of MVC-COV1901<sup>11</sup> had shown that hamsters were protected from  
248 SARS-CoV-2 virus challenge after two vaccinations of S-2P protein adjuvanted with CpG  
249 and aluminum hydroxide. The geometric mean titers in the MD and HD groups were  
250 comparable with those of a panel of control convalescent serum specimens with all  
251 participants in both groups seroconverted after two vaccinations. Therefore, a MD of S-2P  
252 combined with CpG 1018 and aluminum hydroxide was deemed adequate to elicit a profound  
253 humoral immune response.

254 This interim report has some limitations: small size of the trial, the short period of  
255 follow-up at this time point, and the participants' young age and good health status. We were  
256 not able to assess the durability of the immune responses after Day 57 in this interim report.  
257 However, participants will be followed up for 6 months after the second vaccination with  
258 scheduled blood collections throughout that period to evaluate the humoral immunologic  
259 responses. Although the level of immunity needed to protect from COVID-19 remains  
260 unknown, NIBSC 20/130 standard serum was tested in terms of wild-type SARS-CoV-2  
261 neutralizing antibody titer for the development and evaluation of serological assays for the

262 detection of antibodies against SARS-CoV-2, as a positive control.

263       These safety and immunogenicity findings support further advancement of the  
264 MVC-COV1901 vaccine to subsequent clinical trials. Of the three doses evaluated, both the  
265 MD and HD elicited high neutralizing antibody responses with all participants seroconverted  
266 after second vaccination. Further phase 2 trial with 3700 participants (including the  
267 populations at greatest risk for serious Covid-19 such as those with chronic medical diseases  
268 and older adults) is on-going (ClinicalTrials.gov number, NCT04695652)  
269

270 **Acknowledgements**

271 *Author contributions*

272 SM Hsieh, SC Chang and IC Tai had full access to all of the data in the study and take  
273 responsibility for the integrity of the data and the accuracy of the data analysis. SC Chang  
274 and IC Tai contributed equally and are joint corresponding authors.

275 Concept and design: SM Hsieh and IC Tai

276 Acquisition, or interpretation of data: SM Hsieh, SC Chang, WD Liu, and YS Huang

277 Drafting and preparing the manuscript: SM Hsieh, SC Chang, WD Liu, YS Huang, YJ Lin,

278 EF Hsieh, and IC Tai

279 Critical revision of the manuscript for important intellectual content: SM Hsieh, SC Chang

280 Laboratory assays set up and analysis of data: YJ Lin, and EF Hsieh

281 Administrative, technical, or material support: Charles Chen and WC Lian

282 All authors reviewed and approved of the final version of the manuscript.

283 *Conflict of interests Disclosure*

284 Szu-Min Hsieh, Shan-Chwen Chang, Wang-Da Liu, Yu-Shan Huang declared that they have

285 no known competing financial interests or personal relationships that could have appeared to

286 influence the work reported in this paper; Yi-Jiun Lin, Erh-Fang Hsieh, Wei-Cheng Lian,

287 Charles Chen, I-Chen Tai reported grants from Taiwan Centers for Disease Control, Ministry

288 of Health and Welfare, during the conduct of the study. In addition, Yi-Jiun Lin and Charles



289 Chen have a patent US63/040,696 pending.

290 ***Funding/Support***

291 Taiwan Centers for Disease Control, Ministry of Health and Welfare provided grant funding

292 for this study, but does not necessarily stand by any commentary made in this paper.

293 Medigen Vaccine Biologics Corp. was the study sponsor and manufacturer of the

294 investigational vaccine, and co-designed the trial, provided the study product, and

295 coordinated interactions with regulatory authorities. The sponsors used contract clinical

296 research organization to oversee clinical site operations. Data were collected by the clinical

297 site research staff, managed by a contract research organization data management team,

298 monitored by a contract research organization, and overseen by the sponsor and an

299 independent data and safety monitoring board. The interim analysis was performed by the

300 contract research organization. Data interpretation, manuscript preparation were performed

301 by the authors and the decision to submit the manuscript for publication was made by the

302 authors.

303 ***Additional Contributions***

304 All the participants for their dedication to this trial; Dr. Barney S. Graham at Vaccine

305 Research Center, National Institute of Allergy and Infectious Diseases, U.S.A., team

306 members at Dynavax Technologies, Emeryville, CA 94608, USA. and Tsun-Yung Kuo at

307 Department of Biotechnology and Animal Science, National Ilan University, Ilan, Taiwan for

308 providing technical guidance and helpful advice; The investigational staff at National Taiwan  
309 University Hospital, Taiwan and A2 Healthcare Taiwan Corp. for the conduction of the trial;  
310 Leo Lee, Tzay Huar Hong, Hui-Yi Wang, Chian-En Lien, Hao-Yuan Cheng and at Medigen  
311 Vaccine Biologics Corp. for collaboration on protocol development, significant contribution  
312 to the Investigational New Drug (IND) application, and participation in weekly meeting with  
313 the regulatory authority; The members of the safety monitoring committee; Dr. Yu-Chi Chou  
314 and his team members at the RNAi Core Facility, Academia Sinica for the pseudovirus  
315 neutralization assay; Dr. Shin-Ru Shih at Chang Gung University, Taoyuan, Taiwan and Dr.  
316 Chung Guei Huang as well as her team members at Chang Gung Memorial Hospital,  
317 Taoyuan, Taiwan for the wild type SARS-CoV-2 neutralization assay; Team members at  
318 Protech Pharmaservices Corporation for spike specific IgG ELISA assay. Dr. Chia En Lien,  
319 Dr. Meei-Yun Lin, Luke Tzu-Chi Liu, and Meng-Ju Tsai at Medigen Vaccine Biologics Corp.,  
320 Taiwan for manuscript editing and revision.  
321

## 322 **References**

- 323 1. World Health Organization. WHO Director-General's opening remarks at the mission  
324 briefing on COVID-19—11 March 2020. World Health Organization. March 11, 2020.  
325 Accessed March 3, 2021.  
326 <https://www.who.int/director-general/speeches/detail/who-director-general-s-opening-rem>  
327 [arks-at-the-media-briefing-on-covid-19---11-march-2020](https://www.who.int/director-general/speeches/detail/who-director-general-s-opening-rem-arks-at-the-media-briefing-on-covid-19---11-march-2020)
- 328 2. World Health Organization. COVID-19 Clinical management: living guidance, 25  
329 January 2021. World Health Organization. January 25, 2021. Accessed March 3, 2021.  
330 <https://www.who.int/publications/i/item/WHO-2019-nCoV-clinical-2021-1>
- 331 3. Yang J, Zheng Y, Gou X, et al. Prevalence of comorbidities and its effects in patients  
332 infected with SARS-CoV-2: a systematic review and meta-analysis. *Int J Infect Dis.*  
333 2020;94:91-95. doi:10.1016/j.ijid.2020.03.017
- 334 4. Graham BS. Rapid COVID-19 vaccine development. *Science.* 2020;368(6494):945-946.  
335 doi:10.1126/science.abb8923
- 336 5. Wrapp D, Wang N, Corbett KS, et al. Cryo-EM structure of the 2019-nCoV spike in the  
337 prefusion conformation. *Science.* 2020;367(6483):1260-1263.  
338 doi:10.1126/science.abb2507
- 339 6. Pallesen J, Wang N, Corbett KS, et al. Immunogenicity and structures of a rationally

- 340 designed prefusion MERS-CoV spike antigen. Proc Natl Acad Sci U S A.  
341 2017;114(35):E7348-E7357. doi:10.1073/pnas.1707304114
- 342 7. Kuo TY, Lin MY, Coffman RL, Campbell JD, Traquina P, Lin YJ, Liu LT, Cheng J, Wu  
343 YC, Wu CC, Tang WH, Huang CG, Tsao KC, Chen C. Development of CpG-adjuvanted  
344 stable prefusion SARS-CoV-2 spike antigen as a subunit vaccine against COVID-19. Sci  
345 Rep. 2020 Nov 18;10(1):20085. doi: 10.1038/s41598-020-77077-z. PMID: 33208827;  
346 PMCID: PMC7676267.
- 347 8. HEPLISAV-B [Hepatitis B Vaccine (Recombinant), Adjuvanted]. Package insert.  
348 Dynavax Technologies Corporation; 2020.
- 349 9. Mullen GE, Ellis RD, Miura K, et al. Phase 1 trial of AMA1-C1/Alhydrogel plus CPG  
350 7909: an asexual blood-stage vaccine for Plasmodium falciparum malaria. PLoS One.  
351 2008;3(8):e2940. Published 2008 Aug 13. doi:10.1371/journal.pone.0002940
- 352 10. U.S. Food and Drug Administration. Table of Surrogate Endpoints That Were the Basis of  
353 Drug Approval or Licensure. U.S. Food and Drug Administration. August 20, 2020.  
354 Accessed March 3, 2021.  
355 [https://www.fda.gov/drugs/development-resources/table-surrogate-endpoints-were-basis-](https://www.fda.gov/drugs/development-resources/table-surrogate-endpoints-were-basis-drug-approval-or-licensure)  
356 [drug-approval-or-licensure](https://www.fda.gov/drugs/development-resources/table-surrogate-endpoints-were-basis-drug-approval-or-licensure)
- 357 11. CE Lien, YJ Lin, TY Kuo, et al. CpG-adjuvanted stable prefusion SARS-CoV-2 spike  
358 protein protected hamsters from SARS-CoV-2 challenge. BioRxiv. Published online

359 January 7, 2021. doi: <https://doi.org/10.1101/2021.01.07.425674>

360 **Figure**

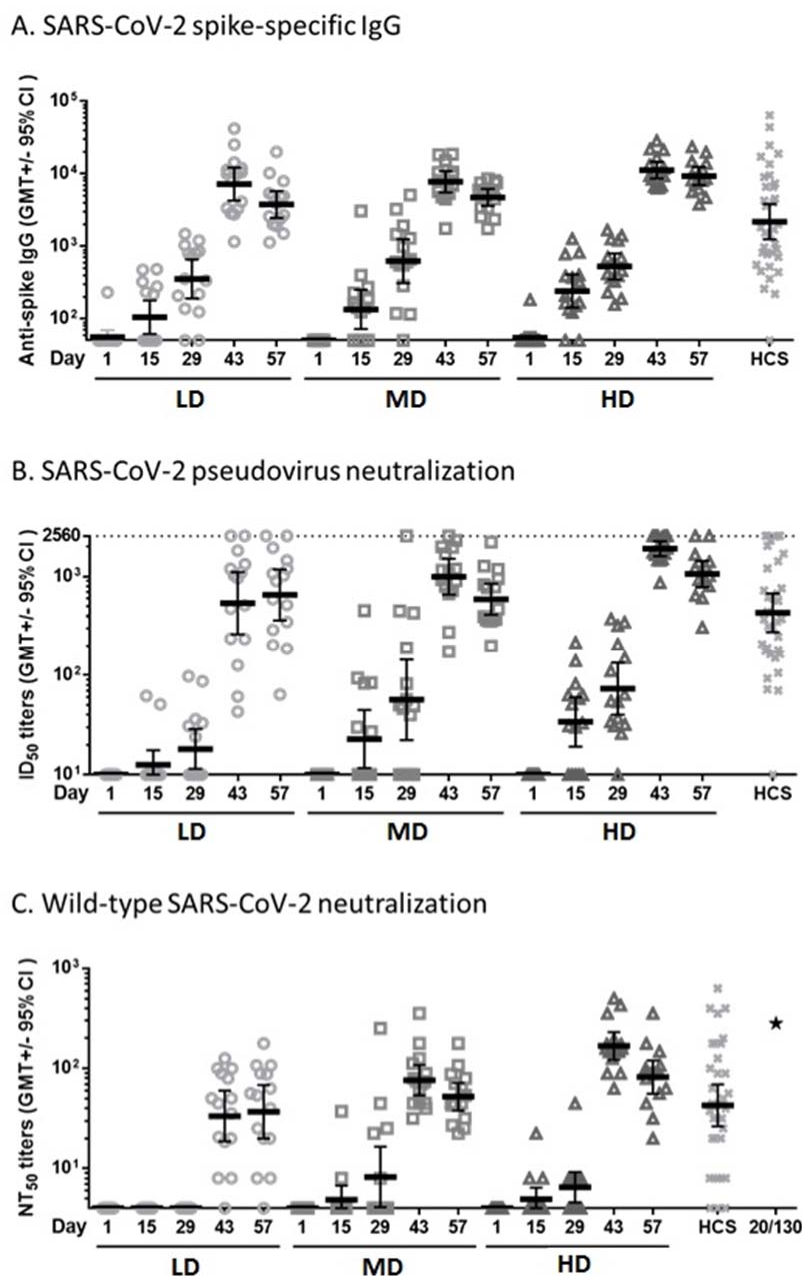

361

362 **Fig 1. Summary of Humoral Immune Response**

363 Sera of participants vaccinated with LD, MD, or HD of MVC-COV1901 were measured for

364 anti-spike IgG by (A) ELISA, and neutralization titers were measured by (B) pseudovirus

365 neutralization assay or (C) live virus neutralization assay. Human convalescent sera (HCS)  
366 from 35 recovered COVID-19 patients were analysed by the same assays for comparison and  
367 NIBSC 20/130 standard was used in the live virus neutralization assay as a standard (asterisk  
368 in panel C). Bars indicate geometric mean titers and error bars indicate 95% confidence  
369 intervals. A: The GMTs at Day 43 in terms of SARS-CoV-2 spike specific IgG were  
370 7178.245 (LD), 7746.086 (MD), 11220.58 (HD), and 2179.598 (HCS); B: The GMTs at Day  
371 43 in terms of SARS-CoV-2 pseudovirus ID<sub>50</sub> were 538.496 (LD), 993.075 (MD), 1905.840  
372 (HD), and 430.468 (HCS); C: The GMTs at Day 43 in terms of wild type SARS-CoV-2 NT<sub>50</sub>  
373 were 33.317 (LD), 76.307 (MD), 167.402 (HD), and 42.674 (HCS). The value of NIBSC  
374 20/130 standard was 281.84. (as shown in asterisk)  
375  
376

377 **Tables**

378 **Table 1. Demographic Characteristics of Eligible Participants**

| <b>Demographic characteristics</b> | <b>LD</b>     | <b>MD</b>     | <b>HD</b>     | <b>Total</b>  |
|------------------------------------|---------------|---------------|---------------|---------------|
| <b>No. of Participants</b>         | 15            | 15            | 15            | 45            |
| <b>Age</b>                         |               |               |               |               |
| Mean (SD), years                   | 36.7 (8.97)   | 33.3 (8.03)   | 31.5 (5.78)   | 33.8 (7.84)   |
| <b>Gender</b>                      |               |               |               |               |
| Male, No. (%)                      | 7 (46.7%)     | 9 (60.0%)     | 12 (80.0%)    | 28 (62.2%)    |
| Female, No. (%)                    | 8 (53.3%)     | 6 (40.0%)     | 3 (20.0%)     | 17 (37.8%)    |
| <b>BMI (kg/m<sup>2</sup>)</b>      |               |               |               |               |
| Mean (SD)                          | 23.18 (3.394) | 23.30 (3.084) | 23.17 (2.429) | 23.22 (2.928) |

379
